# Supplementary material
Source: PubMed Central journal article supplement (PMC2605612)
Supplement: NIHMS82555-supplement-01.pdf [file NIHMS82555-supplement-01.pdf]

### Supplementary figure 1

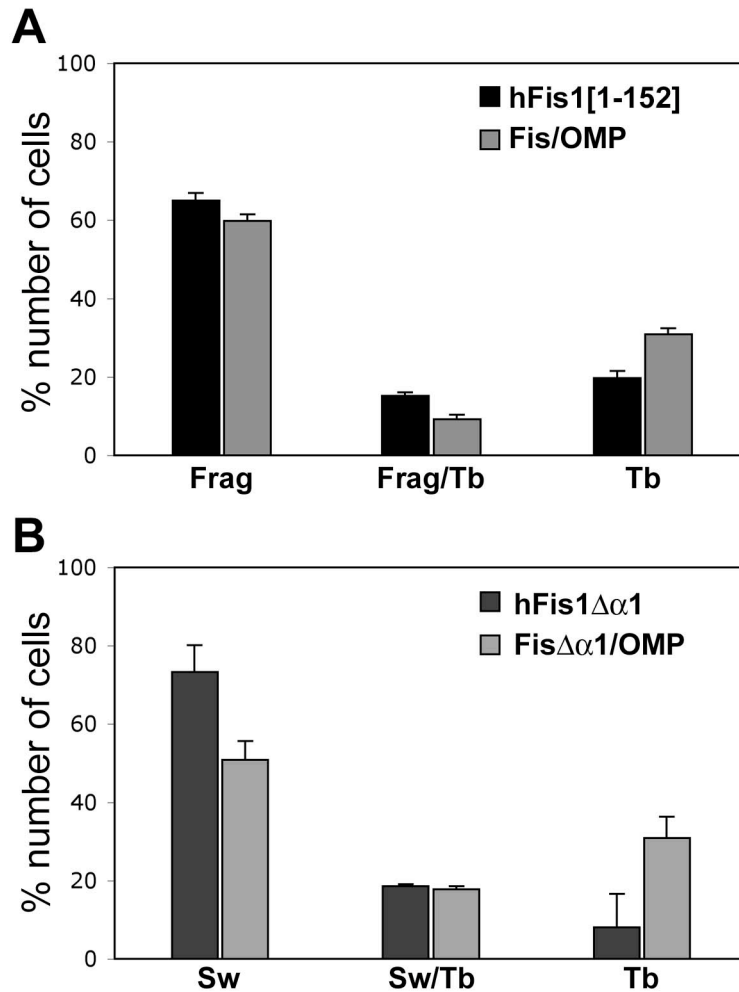

**Supplementary figure 1. Quantification of mitochondrial morphologies in cells transfected with hFis1/OMP25 chimeric proteins.** 200-300 cells transfected with each construct were counted for morphology assessment. (A) Fis/OMP chimera in which the C-terminal region of hFis1 is substituted with that of OMP25 caused the fragmented mitochondrial phenotype, similar to the one seen in cells overexpressing full-length hFis1. (B) Similar to cells overexpressing  $\alpha$ 1-deleted hFis1 (hFis1 $\Delta\alpha$ 1), swollen mitochondria are prevalent in cells overexpressing the  $\alpha$ 1-deleted form of the Fis/OMP chimera (Fis $\Delta\alpha$ 1/OMP). Frag: cells containing fragmented mitochondria, Frag/Tb: cells containing both fragmented and tubular mitochondria, Tb: cells containing tubular mitochondria, Sw: cells containing swollen mitochondria, Sw/Tb: cells containing both swollen and tubular mitochondria. Error bars represent SEM.

Supplementary figure 2

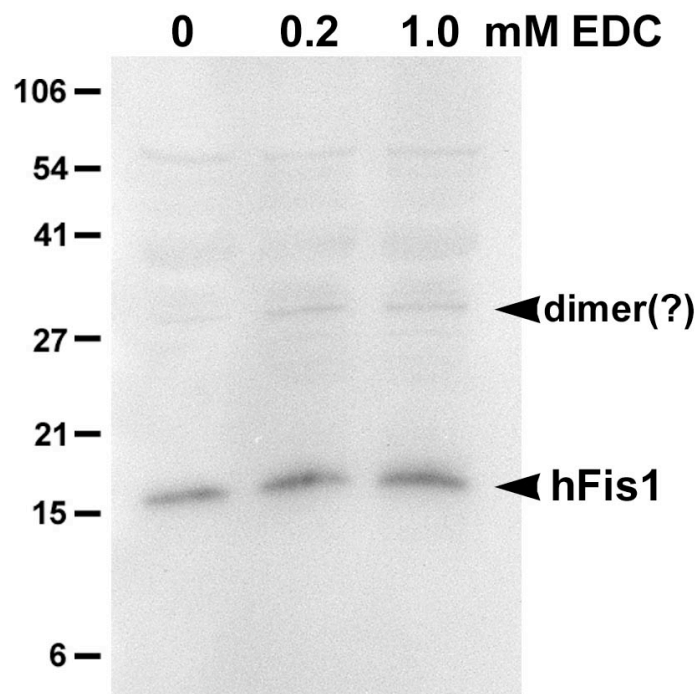

**Supplementary figure 2. Detection of potential dimer of endogenous hFis1.** BHK 21 cells were crosslinked with 0.2 and 1.0 mM EDC and crosslinked proteins were subjected to immunoblotting using anti-hFis1 antibodies. Similar to overexpressed full-length hFis1, a small amount of potential dimer was observed upon the EDC crosslinking. Because this dimer-sized band was also faintly visible in the uncrosslinked sample, it is possible that it is a non-specific band or a stable SDS-resistant hFis1 dimer.
